# Supplementary material for: Identification of Risk Factors for Suicide and Insights for Developing Suicide Prevention Technologies: A Systematic Review and Meta-Analysis
Source: Hindawi journal article supplement (doi:10.1155/2023/3923097), 2023-03-13
Supplement: f1 [file 3923097.f1.docx]

Appendix A. Databases reviewed and search strings used for the systematic review

| Database | Search Query | | Results | | Date of Search |
| --- | --- | --- | --- | --- | --- |
| ACM Digital Library | [[All: "risk factor?"] OR [All: "risk quotient"] OR [All: "contributing factor?"] OR [All: "relationship between"]] AND [[All: "suicide"] OR [All: "suicidal ideation"] OR [All: "suicidal thought?"] OR [All: "suicide risk"] OR [All: "suicide attempt"] OR [All: "suicidality"]] | 351 | | | June 3, 2022 |
| IEEE Xplore | (("Index Terms":"risk factor*" OR "Index Terms":"risk quotient" OR "Index Terms":"contributing factor*" OR "Index Terms":"relationship between") AND ("Index Terms":"suicide" OR "Index Terms":"suicidal ideation" OR "Index Terms":"suicidal thought*" OR "Index Terms":"suicidal behavior" OR "Index Terms":"suicidal tendenc*" OR "Index Terms":"suicidal attempt" OR "Index Terms":"suicide risk" OR "Index Terms":"suicidality")), (("Document Title":"risk factor*" OR "Document Title":"risk quotient" OR "Document Title":"contributing factor*" OR "Document Title":"relationship between") AND ("Document Title":"suicide" OR "Document Title":"suicidal ideation" OR "Document Title":"suicidal thought*" OR "Document Title":"suicidal behavior" OR "Document Title":"suicidal tendenc*" OR "Document Title":"suicidal attempt" OR "Document Title":"suicide risk" OR "Document Title":"suicidality")) | | | 15 | June 3, 2022 |
| PsycINFO | ((MA suicide OR KW suicidal ideation OR KW suicidal thoughts OR KW suicidal behavior OR KW suicidal behaviour OR KW suicidal tendency OR KW suicidal tendencies OR KW suicidal thought OR KW suicidal attempt OR KW suicide risk OR KW suicidality) AND  (MA risk factors OR KW risk factors OR KW risk factor OR KW risk quotient OR KW contributing factors)) | | | 726 | June 3, 2022 |
| PubMed | ("Suicide"[MeSH Terms] OR "Suicide"[Title] OR "suicidal behavior"[Title] OR "suicidal behaviour"[Title] OR "suicidal ideation"[Title] OR "suicidal tendency"[Title] OR "suicidal attempt"[Title] OR "suicide risk"[Title]) AND ("Risk Factors"[MeSH Terms:noexp] OR "risk factor"[Title]) | | | 110 | June 3, 2022 |
