# Supplementary material for: Identification of Risk Factors for Suicide and Insights for Developing Suicide Prevention Technologies: A Systematic Review and Meta-Analysis
Source: Hindawi journal article supplement (doi:10.1155/2023/3923097), 2023-03-13
Supplement: f2 [file 3923097.f2.docx]

Appendix B: Characteristics of included studies

| **Author** | **Year** | **Country** | **Study design** | **Total sample size** | **Suicide** | **Targeted age group** | **Sex (F = Female,**  **M = Male)** | **Age range (years)** | **Period of study** | **Study outcome** | **Assessment tools** | **Risk factor association (SI = Suicidal Ideation, SP = Suicidal Plan, SA = Suicide Attempt, HR = Hazard Ratios, AOR = Adjusted Odds Ratio, CI = Confidence Interval, RR = Relative Risks)** |
| --- | --- | --- | --- | --- | --- | --- | --- | --- | --- | --- | --- | --- |
| Arafat et al. | 2021 | Bangladesh | Case-control | 200 | 100 | General | F = 51%  M = 49% | 26.3-26.7 | 2019 - 2020 | Suicide death | Semi-structured interview responses, SCID-I, SCID-II, Paykel's Life Events Schedule | Adverse life events (85.9%; 79.6 - 90.2), Mental disorder (49.5%; 45.3 - 53.4) |
| Bellis et al. | 2014 | Eastern Europe | Cross-sectional | 10,696 | Not Reported. | Young adults | F = 59.7%, M = 40.3% | 18-25 | 2010 - 2013 | Suicide attempt | Family health history questionnaire by US Centers for Disease Control & Prevention | (Four or more) adverse childhood experiences (48.53; 31.98 - 76.65) |
| Chau et al. | 2014 | France | Cross-sectional | 1,559 | Not Reported. | Adolescents | F = 50.1%, M = 48.9% | <16 | 2010 | Suicide attempt | Questionnaire | Girls living with divorced/separated parents, reconstructed families, single parents, among adolescents living with parents divorced/separated and in reconstructed families, associations between SA and poor social support, having sustained violence, sexual abuse, and cannabis use were significant for girls only (age HR between 3.93 and 6.97) |
| Dasagi et al. | 2021 | USA | Cross-sectional | 13,731 | Not Reported. | Adolescents | F = 50.7%, M = 49.3% | 14-18 | 2017 | Suicidal ideation, suicide plan | National Youth Risk Behaviour Surveillance Survey (YRBSS) - US, 2017 | Heavy cigarette smoking (11+/day) - suicidal ideation (AOR 2.97 CI [1.6 - 5.51]), suicide plan (AOR 2.11 [1.34 - 3.32]). Past 30 days cigarette smoking - suicidal ideation (AOR 3.15 [2.55 - 3.9]), suicide plan (AOR 3.04 [2.34 - 3.92]) |
| Kaess et al. | 2011 | Germany | Cross-sectional | 5,512 | 432 | Adolescents | F = 49.8%, M = 50.2% | 14-15 | 2004 - 2005 | Suicidal ideation, suicide attempt | Schedule for Affective disorders and Schizophrenia for School-Age Children, Youth Self Report (YSR), Child Behaviour Checklist (CBCL) | Female gender - suicidal thoughts OR (1.454), suicidal attempt OR (1.532), emotional, behavioural problems, anxious/depressed OR (1.298) |
| La Rosa et al. | 2022 | USA | Cross-sectional | 330 | Not Reported. | Young adults | F = 57.3%, M = 42.4% | 18-23 |  | Suicidal ideation | Positive and Negative Suicide Ideation Inventory (PANSI), Interpersonal Needs Questionnaire (INQ), Retrospective Bullying Questionnaire Modified (RBQ-M), Life Orientation Test-Revised (LOT-R), Depression Anxiety Stress Scales-21 (DASS-21) | Perceived burdensomeness - suicidal ideation when pessimism is low (b = 0.63, CI = [0.47 - 0.79]). Thwarted belongingness - suicidal ideation when optimism is low (b = 0.13, CI = [0.08 - 0.18]) |
| Lawson et al. | 2022 | USA | Cross-sectional | 16,849 | 3,252 | Adults | F = 30.1%, M = 69.9% | 34-35 | 2015 - 2018 | Suicide risk | Adult Needs and Strengths Assessment (ANSA), DSM-5, ICD-10 | Behavioural health needs (9.84 [5.43 - 17.83], self-harm (8.00 [5.25 - 12.18]), prior mental health diagnosis (1.95 [1.19 - 3.20])) |
| Lira et al. | 2022 | Brazil | Cross-sectional | 2,137 | 167 | Young adults | F = 65.9%, M = 34.1% | 19-25 | 2011 | Suicide attempt | Trauma History Questionnaire, Post-Traumatic Stress Disorder Checklist - Civilian Version (PCL-C), Barratt Impulsiveness Scale (BIS-11) | High and medium levels of impulsivity increased the likelihood of SA (OR 7.35; [95% CI] 3.43 - 15.76 and OR 2.74; 95% CI 1.32 - 5.69, respectively), Having experienced psychological neglect more than doubled the odds of SA 2.47 (1.57 - 3.89), Post-traumatic stress disorder and drug use 2.80 (1.92 - 4.08), history of physical/sexual traumatic experiences after 12 years age 2.80 (1.88 - 4.19). |
| Nie et al. | 2021 | USA | Retrospective cohort | 242,952 | 180 | General | F = 56.5%, M = 43.5% | 18+ | Not reported | Suicide death | US National Health Interview Survey, International Classification of Diseases 10th Revision (ICD-10), 2008 Physical Activity Guidelines for Americans, Kessler 6-item psychological distress scale | Unmarried 2.58 (95% CI: 1.44 - 4.62), cigarette smoking (HR, 2.26; 95% CI: 1.49 - 3.43) current alcohol drinking (HR, 1.93; 95% CI: 1.14 - 3.27), serious psychological distress (HR: 3.34; 95% CI: 1.81 - 6.18), men HR 3.75 (95% CI: 1.96 - 7.20), somatic disorders like emphysema, liver disease, kidney disease and cancer (HRs from 2.18 - 4.63). |
| O'Connor et al. | 2015 | Scotland | Prospective cohort | 388 | 361 | Inpatient adults | F = 56.7%, M = 43.3% | 16-71 | 2008-2009 | Suicidal ideation, suicide attempt | Beck Depression Inventory, 20-item  Beck Hopelessness Scale, 21-item Scale for Suicide Ideation, SSI | SA: previous suicide attempts (1.29 [ 1.06 - 1.58]), high levels of intrapersonal (thoughts about the individual and no one else) positive future thinking (OR 1.25, 95% CI [1.07 - 1.44]), suicidal ideation (1.04 [ 1.00 - 1.07]) |
| Ong et al. | 2021 | USA | Cross-sectional | 18,018 | 3,423 | Children, adolescent, inpatient young adults | Not Reported. | < 25 | 2014 | Suicide attempt | ICD-9 | SA across all three age groups: history of suicide attempt (>6 months prior to hospitalization) (5.32 (4.36 - 6.5)), female sex (OR: 2.67; 95% CI: 2.24 - 3.18; p < .0001), depressive disorder (2.07 (1.8 - 2.39)), and being a victim of bullying (OR: 2.19; 95% CI: 1.42 – 3.37; p = .0004). SA pre-adolescent children: uninsured (OR: 5.00; 95% CI: 1.35 – 18.5; p = .016) and having an unsafe home or school environment (0.64(0.41 - 0.98)). |
| Randall et al. | 2015 | USA | Case-control | 4,834 | 192 | Adolescents | Not Reported. | 11-20 | 1994-1996 | Suicide attempt | Questionnaire | Exposure to peer suicide attempts was associated with increased suicide attempts at baseline (RR: 1.93; 95%CI: 1.23 – 3.04) and 1-year follow-up (RR: 1.70; 95%CI: 1.12 – 2.60). |
| Rasheduzzaman et al. | 2022 | Bangladesh | Cross-sectional | 1,844 | 247 | Young adults | F = 30%, M = 70% |  | 2019 | Suicidal ideation, suicidal plan, suicide attempt | Questionnaire | SI, SP, SA: being female, year of academic study, residing in an urban area, using psychoactive substances, experiencing both past year physical and mental illness, experiencing any type of stressful past-year life events, experiencing campus ragging experiencing family mental illness history, and having family suicide attempt history. |
| Leeuwen et al. | 2010 | France | Cross-sectional | 292 | Not Reported. | Adolescents | F = 41.8%, M = 58.2% | 15-21 | 2007-2008 | Suicidal ideation | Suicidal Behaviors Questionnaire-Revised SBQ-R, Immigrant Acculturation Scale IAS, Multi Ethnic Identity Measure MEIM, Inventory of Parent and Peer Attachment IPPA, Adolescent Self-Rating Life Events Checklist ASLEC, Center for Epidemiologic Studies-Depression Scale CES-D 10, Personality Diagnostic Questionnaire Fourth Edition PDQ-4, Family Affluence Scale FAS | Life events were positively related to SI among boys and girls β = .31 and .33, respectively, both p < .0001. Depressive symptoms were a positive significant predictor among boys and girls, β = .27 and .21, p < .0001 and .05, respectively whereas borderline traits were a significant positive predictor among girls only, β = .29, p < .0001. Among boys, only individualism was a significant risk factor for boys and girls, respectively β = .17 and .36, p = 0.04 and <.001 |
| Whaley & Noel | 2013 | USA | Cross-sectional | 3,008 | Not Reported. | Adolescents | F = 49%, M = 51% | 14-18 | 2001 | Suicide risk | Youth Risk Behavioural Survey YRBS | For Asian American students, there were significantly higher depressed/suicidal scores among “mostly D’s and F’s” students than among “mostly A’s” students, t = 2.79, df = 32, p <.05. African American students reporting “mostly D’s or F’s” scored significantly higher on suicide risk than those reporting “mostly A’s,” t = 3.80, df = 36, p <.002. |
| Wilcox et al. | 2010 | USA | Prospective cohort | 1,253 | 11 | Adolescents | F = 52.7%, M = 47.3% | 17-19 | 2004-2008 | Suicidal ideation, suicide plan, suicide attempt | Beck Depression Inventory (BDI), Composite International Diagnostic Interview (CIDI), Center for Epidemiological Studies Depression Scale  (CESD), standard life events scales, Social Support Appraisals Scale (SSAS), Dysregulation Inventory (DI), National Survey on Drug Use and Health (NSDUH) interview, Family Tree Questionnaire | SI: low social support [OR = 3.7, 95% CI (2.0 – 6.6), p < 0.001], childhood or adolescent exposure to domestic violence [OR = 2.7, 95% CI (1.2 – 6.1), p = 0.014], maternal depression [OR = 2.4, 95% CI (1.4 – 4.1), p = 0.002], and high self- reported depressive symptoms [OR = 2.4, 95% CI (1.3 – 4.2), p = 0.003] |
| Wong & Maffini | 2011 | USA | Prospective cohort | 959 | 39 | Adolescents | F = 48%, M = 52% | 14-18 |  | Suicidal ideation, suicide attempt | Center for Epidemiologic Studies Depression Scale, National Longitudinal Study of Adolescent Health | Stronger school relationships and peer relationships |
| Zhang et al. | 2010 | China | Case-control | 808 | 392 | Young adults, adults | F = 45.4%, M = 54.6% | 15-34 | 2005-2008 | Suicide attempt | Structured Clinical Interview for DSM- IV (SCID), face-to-face interviews, 23-item Duke Social Support Index, Paykel’s Interview for Recent Life Events | Strong association between mental illness and suicide was observed after adjustment for sociodemographic characteristics (odds ratio = 10.85, 95% CI = 5.81 – 20.25). Other risk factors included having a lower education level (4.70, 2.35 – 9.79), not being currently married (3.03, 1.61 – 5.70), having a lower level of social support (12.74, 7.15 – 22.68), and having a history of recent and long-term life events (8.12, 3.06 – 17.07) |
| Zubrick et al. | 2016 | Australia | Cross-sectional | 9,277 | 696 | Adolescents | Not Reported. | 12-17 | 2013 - 2014 | Suicidal ideation, suicide attempt | Centers for Disease Control and Prevention (2014) Youth Risk Behavior Surveillance System (YRBSS), Diagnostic Interview Schedule for Children Version IV (DISC-IV) | The presence of a mental disorder shows the largest significant association with lifetime and 12-month suicidal behaviour, along with age, gender, sole parent family status and poor family functioning. Prevalence of lifetime SA was significantly higher for those who met DSM-IV criteria for MDD (24.5%; 95% CI = [14.5% - 34.4%]; p < 0.001), conduct disorder (29.7%; 95% CI = [4.2% - 55.1%]; p < 0.05) and any anxiety disorder (15.6%; 95% CI = [8.4% - 22.8%]; p < 0.001). |
| Wyart et al. | 2016 | France | Case-control | 130 | 0 | Elderly | F = 58.5%, M = 41.5% | 65+ | Not reported | Suicide attempt | Beck Depression Inventory Scale (BDI), Spielberger State Trait Anxiety Inventory (STAI), Mini-International Neuropsychiatric Interview version 5.0, Barrat Impulsivity Scale (BIS-11), National Adult Reading test (NART)22 , Trail Making Test (TMT) | SA +: depression, psychotropic drugs utilization. association between the subgroup of violent suicide attempters and disadvantageous decision-making |
| Cabello et al. | 2020 | Multi-countries (China, Ghana, India, Mexico, Russia, South Africa, Finland, Poland, Spain) | Cross-sectional | 52,150 | 1,304 | Adults, elderly | F = 58%, M = 42% | 18-65+ | 2007-2010 | Suicidal ideation, suicide attempt | Study on Global AGEing and Adult Health (SAGE), Collaborative Research on Ageing in Europe (COURAGE), WHO Composite International Diagnostic Interview | SA +: higher disability/more than two health conditions (OR = 2.69, p = 0.044), SI rate was significantly higher for older people than for the young-and-middle age people (chi2 = 139.01; p < 0.001), being female (OR = 0.73; p = 0.050), younger age (OR = 0.97; p < 0.001), of chronic health conditions were related to the presence higher isolation (OR = 1.13; p = 0.026), and higher number of 12-month suicide attempts, Food deprivation (OR = 2.22; [1.6 - 3.08]) |
| Schmutte & Wilkinson | 2020 | USA | Retrospective cohort | 26,884 | 26,884 | Elderly | F = 16.8%, M = 83.2% | 65-85+ | 2003−2016 | Suicide death | National Violent Death Report- ing System (NVDRS) | A physical health problem (OR = 0.88 (0.83 - 0.93) p < 0.001) was the most prevalent precipitating circumstance but was more common among older adults without known mental illness. Past suicide attempt (OR = 4.88 (4.36 - 5.46) p < 0.001), disclosure of suicidal intent(OR = 1.52 (1.42 - 1.62) p < 0.001), depressed mood(OR = 2.17 (2.05 - 2.30) p < 0.001), and past mental health or substance abuse treatment(OR = 275.44 (230.71 - 328.85) p < 0.001), suicide of relative/friend (OR=1.96 (1.54 - 2.49) p < 0.001), job or financial problem (OR = 1.69 (1.41 - 2.03) p < 0.001) |
| Qin | 2011 | Denmark | Case-control | 444,297 | 222 | General | F = 45.4%, M = 54.6% | < 35 to 60+ | 1969 onwards | Suicide risk | International Classification of Diseases (ICD-8), (ICD-10) | A recorded previous history of hospitalization due to a mental disease. Depressive disorders, particularly recurrent depression (29.7 (26.7 - 33.0)), were associated with a higher risk of suicide for both young males and females. Substance use disorder (26.1 (21.2 - 32.1)) and borderline personality disorder (55.5 (40.9 - 75.3)) also had a strong influence on young people suicidal behaviour. |
| Nock et al. | 2013 | USA | Cross-sectional | 6,483 | 266 | Adolescents | Not Reported. | 13-18 | Not reported | Suicidal ideation, suicide attempt | World Health Organization CIDI, National  Comorbidity Survey Replication Adolescent Supplement (NCS-A), Suicidal Behavior Module of the Composite International Diagnostic Interview (CIDI), DSM-IV diagnoses, Schedule for Affective Disorders and Schizophrenia for School-Age Children, Present and Lifetime Version, Service Assessment for Children and Adolescents | Mood, anxiety, impulse-control and substance use disorders significantly predicted subsequent SA in adolescents. 4.5 to 7.4 for disruptive behavior disorders, from 4.1 to 12.3 for distress disorders, from 2.8 to 4.8 for substance disorders, and from 2.5 to 3.5 for fear/anger disorders. The OR for bipolar disorder is 8.8. SA+= post-traumatic stress disorder (OR = 3.3), MDD/DYS (major depressive disorder and/or dysthymia) (OR = 6.2), oppositional defiant disorder (OR = 2.1), eating disorder (OR = 3.2), and bipolar disorder (OR = 2.9). |
| Kavalidou et al. | 2017 | England | Cross-sectional | 7,389 | 776 | Adults | F = 60%, M = 40% | 16+ | 2007 | Suicidal ideation | Adult Psychiatric Morbidity Survey (APMS), Clinical Interview Schedule (CIS-R), Alcohol Use Disorders Identification Test (AUDIT), Severity of Alcohol Dependence Questionnaire (SADQ-C), computer-assisted self-completion inter- view (CASI) | Multimorbidity (OR = 24.053; 95% CI (14.505 – 39.885), p < 0.001) and common mental disorders only (OR = 22.012; 95% CI (11.901 – 40.716), p < 0.001) groups were associated with higher levels of suicidal ideation relative to those with neither physical health condition nor common mental disorders. |
