# Supplementary figures and images for: Identification of Risk Factors for Suicide and Insights for Developing Suicide Prevention Technologies: A Systematic Review and Meta-Analysis
Source: Hindawi journal article supplement (doi:10.1155/2023/3923097), 2023-03-13

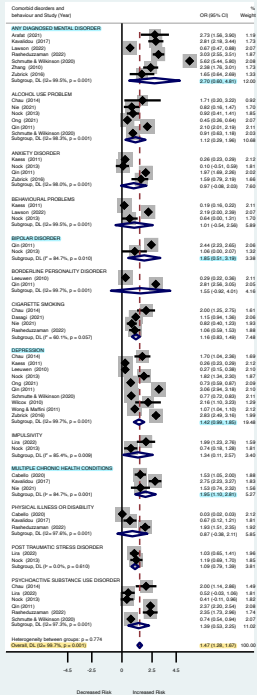

NOTE: Weights and between subgroup heterogeneity test are from random effects model

Supplement: f3 [file 3923097.f3.pdf]
